# Supplementary material for: New kind of electride sandwich complexes based on the cyclooctatetraene ligand M12(η8-C8H8)2M22(M1= Na, K and M2= Ca, Mg): a theoretical study
Source: Royal Society of Chemistry journal article supplement (doi:10.1039/d2cp04127h), 2023-01-01
Supplement: d2cp04127h1.pdf [file d2cp04127h1.pdf]

## Supplementary information

### **A New Kind of Sandwich-Electride Complexes of Cyclooctatetraene Ligand $M^1_2(\eta^8-C_8H_8)_2M^2_2$ ( $M^1 = Na, K$ and $M^2 = Ca, Mg$ ): A Theoretical Study**

RiaSinha Roy, AvikGhosh, Soumadip Banerjee, SunitiGhosh and Abhijit K. Das\*

School of Mathematical & Computational Sciences, Indian Association for the  
Cultivation of Science, Jadavpur, Kolkata-700032

Corresponding Author E-mail: [spakd@iacs.res.in](mailto:spakd@iacs.res.in)

**Table S1** WBI index of the reported complex

| Molecule                                                                      | WBI index        |                  |
|-------------------------------------------------------------------------------|------------------|------------------|
|                                                                               | C-M <sup>1</sup> | C-M <sup>2</sup> |
| Na <sub>2</sub> (C <sub>8</sub> H <sub>8</sub> ) <sub>2</sub> Mg <sub>2</sub> | 0.01             | 0.03             |
| Na <sub>2</sub> (C <sub>8</sub> H <sub>8</sub> ) <sub>2</sub> Ca <sub>2</sub> | 0.01             | 0.03             |
| K <sub>2</sub> (C <sub>8</sub> H <sub>8</sub> ) <sub>2</sub> Mg <sub>2</sub>  | 0.01             | 0.03             |
| K <sub>2</sub> (C <sub>8</sub> H <sub>8</sub> ) <sub>2</sub> Ca <sub>2</sub>  | 0.01             | 0.03             |

**Table S2** Atomic and orbital contribution towards the M<sup>2</sup>-M<sup>2</sup> bond

| Molecule                                                                      | Atomic (percentage )<br>contribution of M <sup>2</sup> to M <sup>2</sup> -M <sup>2</sup><br>bond | Orbital (percentage ) contribution of M <sup>2</sup> to<br>M <sup>2</sup> -M <sup>2</sup> bond |
|-------------------------------------------------------------------------------|--------------------------------------------------------------------------------------------------|------------------------------------------------------------------------------------------------|
| Na <sub>2</sub> (C <sub>8</sub> H <sub>8</sub> ) <sub>2</sub> Mg <sub>2</sub> | Mg(50%)-Mg(50%)                                                                                  | Mg : s( 74.26%)p 0.34( 25.39%)                                                                 |
|                                                                               |                                                                                                  | Mg : s( 74.34%)p 0.34( 25.31%)                                                                 |
| Na <sub>2</sub> (C <sub>8</sub> H <sub>8</sub> ) <sub>2</sub> Ca <sub>2</sub> | Ca(50%)-Ca(50%)                                                                                  | Ca: s( 72.76%)p 0.37( 26.60%)                                                                  |
|                                                                               |                                                                                                  | Ca: s( 72.76%)p 0.37( 26.60%)                                                                  |
| K <sub>2</sub> (C <sub>8</sub> H <sub>8</sub> ) <sub>2</sub> Mg <sub>2</sub>  | Mg(50%)-Mg(50%)                                                                                  | Mg: s( 73.63%)p 0.35( 26.05%)                                                                  |
|                                                                               |                                                                                                  | Mg: s( 73.67%)p 0.35( 26.00%)                                                                  |
| K <sub>2</sub> (C <sub>8</sub> H <sub>8</sub> ) <sub>2</sub> Ca <sub>2</sub>  | Ca(50%)-Ca(50%)                                                                                  | Ca: s( 72.16%)p 0.38( 27.19%)                                                                  |
|                                                                               |                                                                                                  | Ca: s( 72.15%)p 0.38( 27.19%)                                                                  |

**Table S3.** ELF values of population of the reported electrone systems

| Electrone System<br>reported                                                  | N(pop) |
|-------------------------------------------------------------------------------|--------|
| Be <sub>2</sub> (η <sup>5</sup> -C <sub>5</sub> H <sub>5</sub> ) <sub>2</sub> | 2.15   |
| Mg <sub>2</sub> (η <sup>5</sup> -C <sub>5</sub> H <sub>5</sub> ) <sub>2</sub> | 1.91   |

**Table S4** Comparison of the  $\gamma_{\text{avg}}$  (au) of the reported system with our studied system.

| Electride System reported                    | $\gamma_{\text{avg}}$ | Studied system                                   | $\gamma_{\text{avg}}$ |
|----------------------------------------------|-----------------------|--------------------------------------------------|-----------------------|
| $\text{Be}_2(\eta^5\text{-C}_5\text{H}_5)_2$ | $6.3 \times 10^4$     | $\text{Na}_2(\text{C}_8\text{H}_8)_2\text{Mg}_2$ | $2.56 \times 10^5$    |
| $\text{Mg}_2(\eta^5\text{-C}_5\text{H}_5)_2$ | $1.1 \times 10^5$     | $\text{Na}_2(\text{C}_8\text{H}_8)_2\text{Ca}_2$ | $1.44 \times 10^6$    |
|                                              |                       | $\text{K}_2(\text{C}_8\text{H}_8)_2\text{Mg}_2$  | $2.61 \times 10^5$    |
|                                              |                       | $\text{K}_2(\text{C}_8\text{H}_8)_2\text{Ca}_2$  | $1.39 \times 10^6$    |

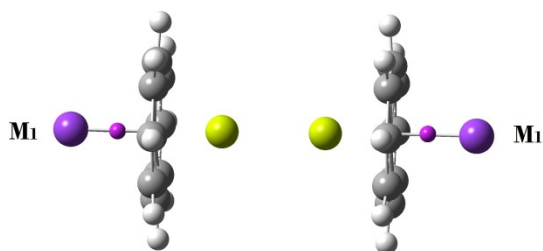

Ghost atom placed  $1\text{\AA}$  towards  $\text{M}^1$

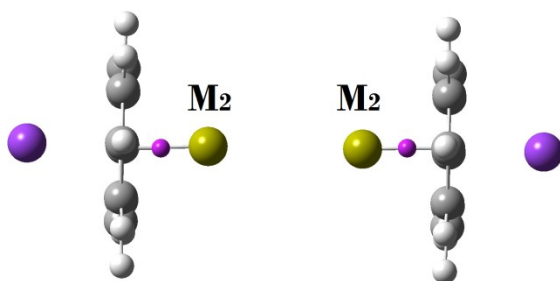

Ghost atom placed 1 Å towards  $M^2$

**Fig . S1** Placement of the ghost atom 1 Å away from the ring.

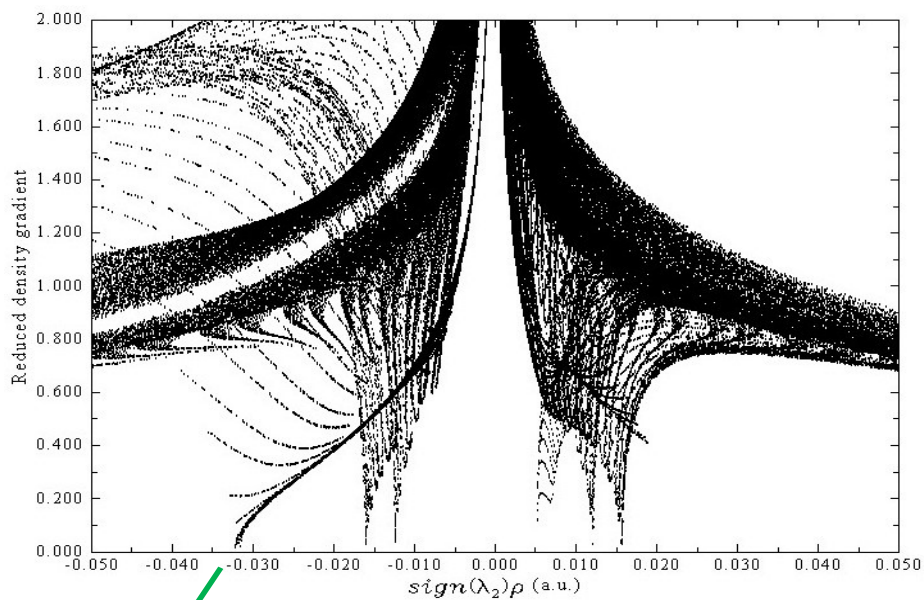

**Bonding interaction**

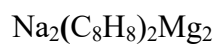

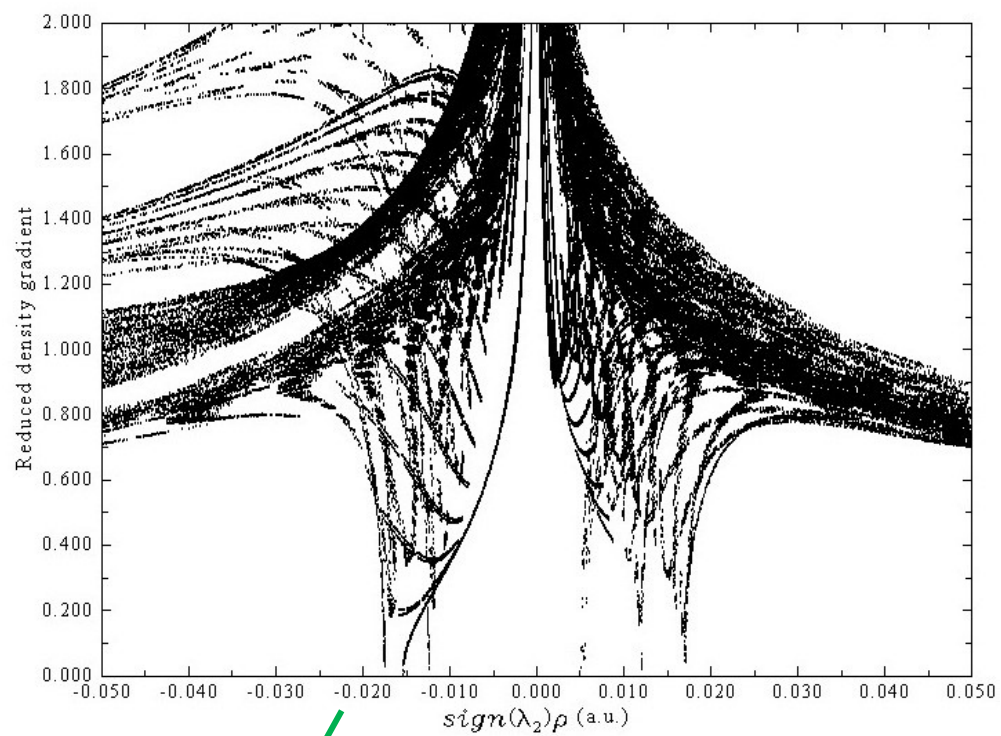

Bonding interaction

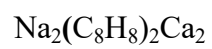

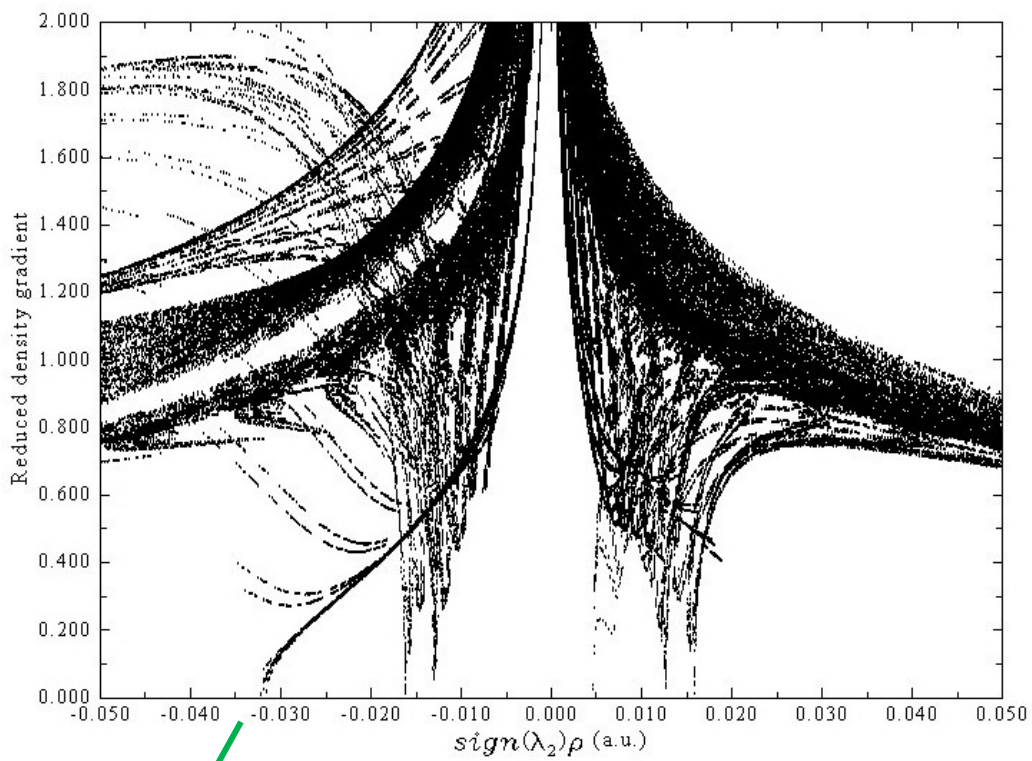

Bonding interaction

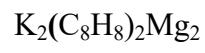

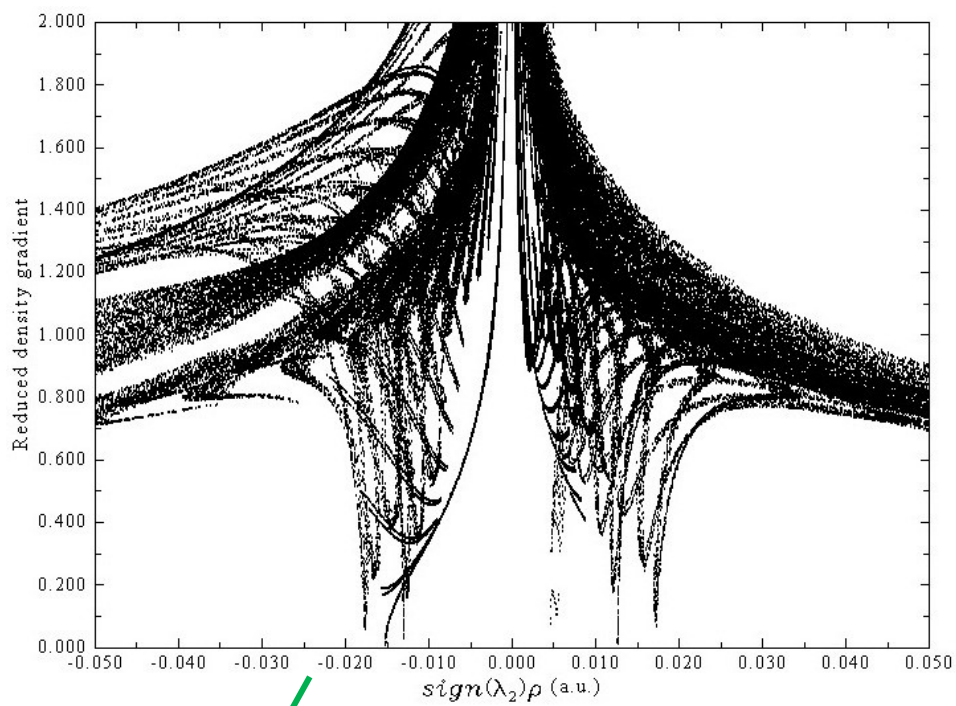

Bonding interaction

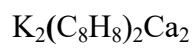

**Fig .S2** .NCI plot (Reduced density gradient) versus second eigen value of the electron-density Hessian ( $\lambda_2$ ) $\rho$ )
